# Supplementary material
Source: PubMed Central journal article supplement (PMC4716669)
Supplement: mmc1.pdf [file mmc1.pdf]

The American Journal of Human Genetics

Supplemental Data

## **Spell Checking Nature: Versatility of CRISPR/Cas9 for Developing Treatments for Inherited Disorders**

**Daria Wojtal, Dwi U. Kemaladewi, Zeenat Malam, Sarah Abdullah, Tatianna W.Y. Wong, Elzbieta Hyatt, Zahra Baghestani, Sergio Pereira, James Stavropoulos, Vincent Mouly, Kamel Mamchaoui, Francesco Muntoni, Thomas Voit, Hernan D. Gonorazky, James J. Dowling, Michael D. Wilson, Roberto Mendoza-Londono, Evgueni A. Ivakine, and Ronald D. Cohn**

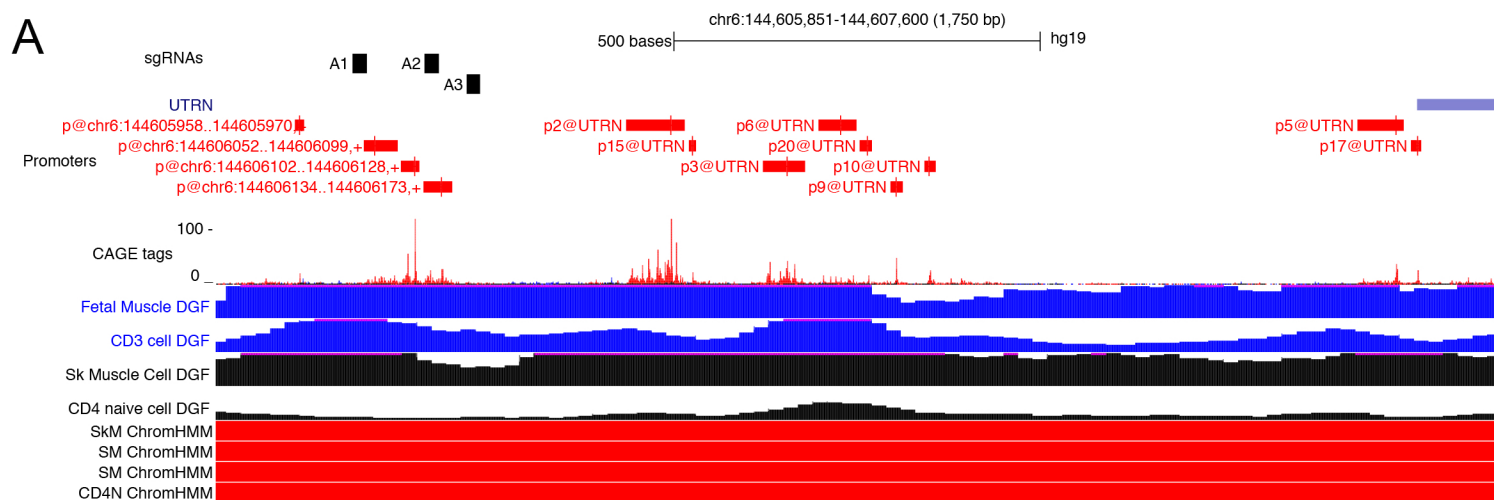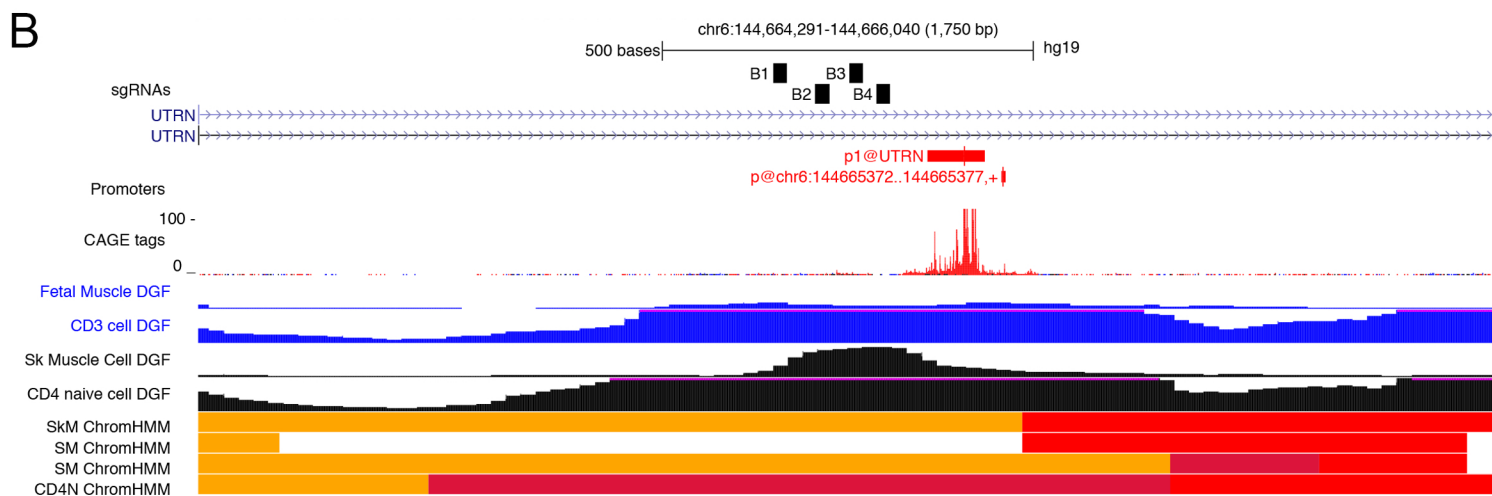

Figure S1

**Figure S1. Zoomed in location of sgRNAs relative to *UTRN* transcription start sites (TSSs), DNase I hypersensitivity foot prints and chromatin state maps.**

Zoomed in view of Figure 1D. (A) sgRNAs targeting promoter A are plotted above experimentally determined TSSs. (B) sgRNAs targeting promoter B are plotted above experimentally determined TSSs. These have been obtained from over 300 primary tissues assay by FANTOM5. The maximum signal at each promoter region is shown below the TSSs. Digital DNase Footprinting (DGF) assays for Fetal Muscle and primary CD3 cells are shown in blue. DGF assays for skeletal muscle cells, skeletal muscle and naïve CD4 cells are shown in black. Chromatin State maps from the Roadmap Epigenomic Consortium are shown for skeletal muscle cells (SkM), skeletal muscle (SM) and naïve CD4 cells (CD4N). Red chromatin state indicates transcription start sites and yellow indicates enhancer states. The A guides all fall within muscle promoter regions. The B guides fall into an enhancer region immediately upstream of an annotated promoter region. In CD4 cells this region is considered an active promoter. At promoter B region there is a weak DGF footprint in muscle cells relative to CD4 cells. Data was plotted using the UCSC genome browser. Fantom5, DGF and chromatin state data was obtained via UCSC “Track Hubs”.

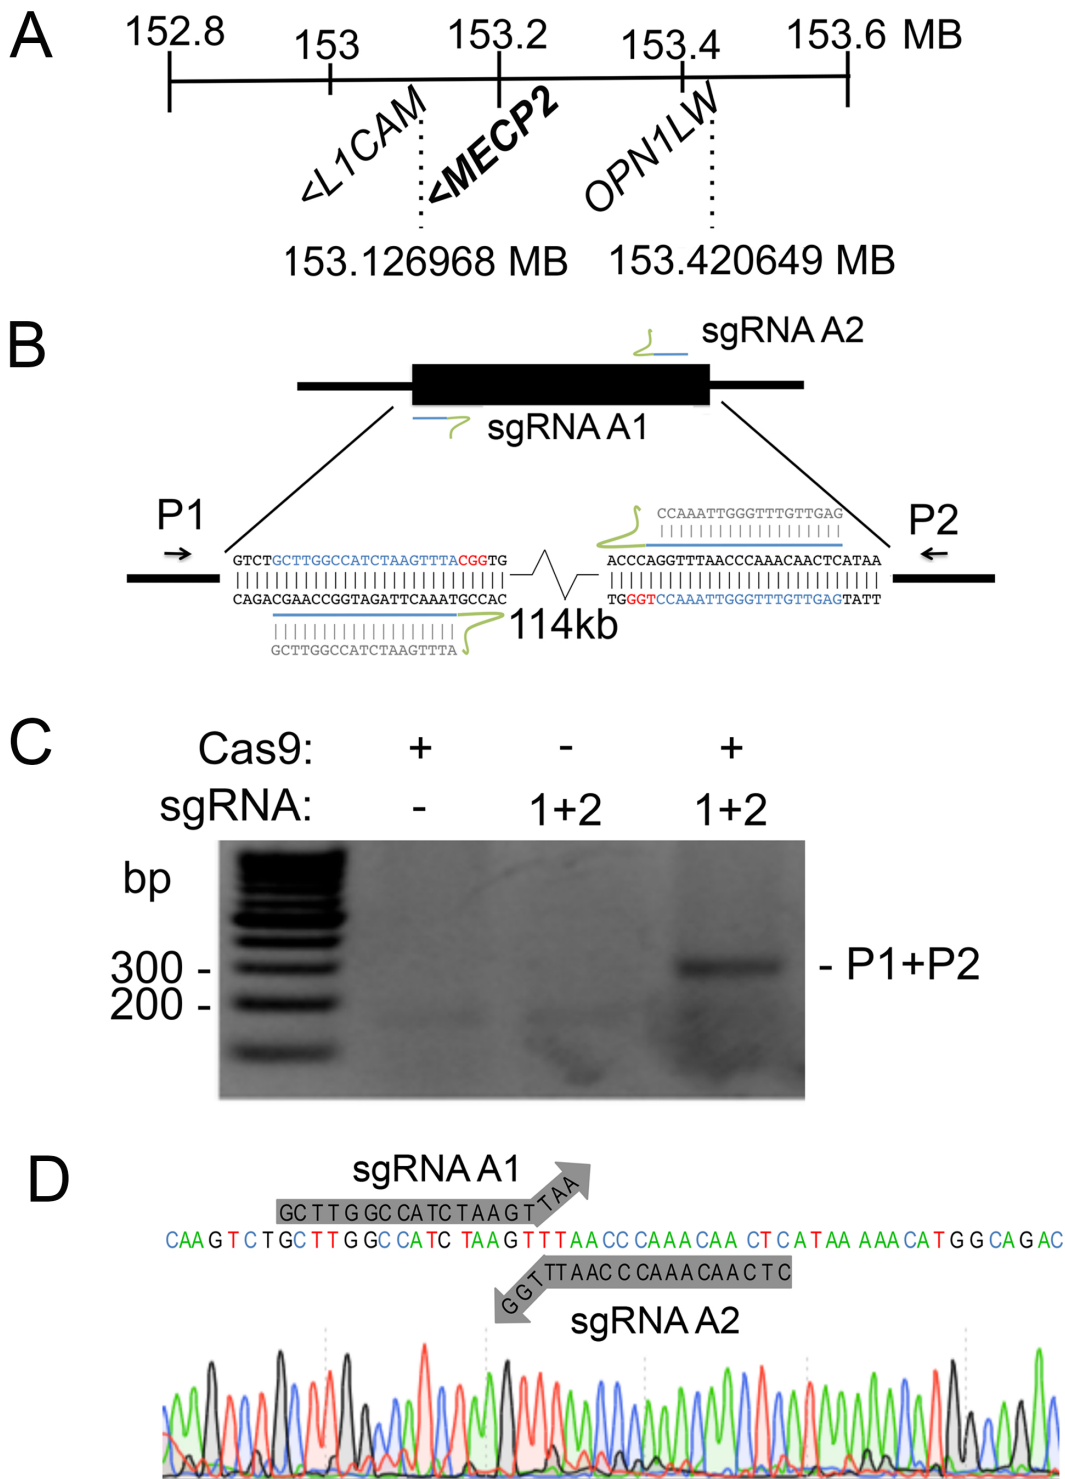

Figure S2

**Figure S2. Targeted deletion of a 114 kb fragment of DNA containing *MECP2* gene in WT genomic DNA.**

(A) Schematic depicting the q28 region (h19) of the X-chromosome which has been duplicated in this *MECP2* duplication syndrome-affected individual. The breakpoints of the duplication, as indicated by the dotted lines, fall within the *L1CAM* and *OPN1LW* genes and include intervening genes one of which is *MECP2*. (B) Relative position of *MECP2*: sgRNAs 1 and 2 to WT genomic DNA. (C) Presence of targeted deletion assessed using PCR with primers P1 and P2 in human primary fibroblasts nucleofected with corresponding CRISPR components. Intervening fragment between *MECP2*: sgRNAs 1 and 2 can only be amplified if 114 kb fragment is deleted. Band corresponding to a deletion is only detected in cells nucleofected with the 2 sgRNAs coupled with Cas9. (D) Sequencing read of deletion in human primary fibroblasts with annotated positions of the 2 sgRNAs used.

A

**MECP2:sgRNA A1**

| Name    | Result                                                              | Chr Position             | Score | PCR Primer left          | PCR Primer right         | Amplicon Size |
|---------|---------------------------------------------------------------------|--------------------------|-------|--------------------------|--------------------------|---------------|
| C-OFF 1 | TTCTTGACACATCTAAGTTTATGG -- hit<br>TGCTTGGCCATCTAAGTTTANRG -- query | Chr3:157313782-157313804 | 0.63  | AGACCTAGGCTTCAGTTCACCTGT | CGTCTAATGCCACTGGCTGC     | 450           |
| C-OFF 2 | TGCTTTATCATCTAAGTTTATAG -- hit<br>TGCTTGGCCATCTAAGTTTANRG -- query  | Chr5:74363041-74363063   | 0.71  | GTGGAGCCTGAAGATGTGACTG   | GAGCCTTCCGCAGGTTGTAATC   | 454           |
| C-OFF 3 | TGCTTTATCATCTAAGTTTATGG -- hit<br>TGCTTGGCCATCTAAGTTTANRG -- query  | ChrX:94926307-94926329   | 0.71  | GCTGAAATTTGGAGTGGCTATGGC | CACACATGATTATCGGGAGGAGG  | 524           |
| C-OFF 4 | TGCTTTATCATCTAAGTTTATGG -- hit<br>TGCTTGGCCATCTAAGTTTANRG -- query  | Chr1:216962432-216962454 | 0.71  | GAGTTGCTTCTTACGGATGAGTGG | GCTGTGGTCTATTAAGTGTGCTGC | 489           |
| C-OFF 5 | TGTTTGGAGATCTAAGTTTAGGG -- hit<br>TGCTTGGCCATCTAAGTTTANRG -- query  | Chr3:124377831-124377853 | 0.77  | CACTGGCTTCTGCCTTCT       | GCCCAGTCTGGGTTCTGATTG    | 450           |

**MECP2:sgRNA A2**

| Name     | Result                                                            | Chr Position             | Score | PCR Primer left          | PCR Primer right         | Amplicon Size |
|----------|-------------------------------------------------------------------|--------------------------|-------|--------------------------|--------------------------|---------------|
| C-OFF 6  | TGATTTGTGTGTGTTAAACCAAG -- hit<br>TGAGTTGTTTGGGTAAACCNRG -- query | ChrX:119997612-119997634 | 1.32  | CCTAACTCATTCTATGAGGCCAGC | TAGGAGTGGTGAGAGAGGGAG    | 472           |
| C-OFF 7  | TGGTTTTGGGGTTAAACCCAG -- hit<br>TGAGTTTTGGGTAAACCNRG -- query     | Chr3:58164792-58164813   | 1.39  | AGAAGGTGTGAGGATCCAGGTG   | GTTTACAAGCACCCGTGAGG     | 450           |
| C-OFF 8  | AGAATTGTTTGGGGTAAACCAAG -- hit<br>TGAGTTGTTTGGGTAAACCNRG -- query | Chr8:102985829-102985851 | 1.59  | GGACTTGAACCTATCCTAGGTGC  | CTGCTAAGGCATATCATAGGACGG | 450           |
| C-OFF 9  | TGAATTGTTTGGGTAAACCCAGG -- hit<br>TGAGTTGTTTGGGTAAACCNRG -- query | Chr22:42636319-42636340  | 1.98  | TGACGTCACATTGCAACAAGGGG  | TTCTGGGCCTCCACTGGCAA     | 450           |
| C-OFF 10 | TGAGTTTTAGAGTTAAACCCAGG -- hit<br>TGAGTTTTGGGTAAACCNRG -- query   | Chr3:141297296-141297317 | 2.04  | GGTGCTGCCACTGCAACATG     | CCTCTAGCAACCTGGTAAGGTA   | 450           |

**DMD:sgRNA 1**

| Name     | Result                                                           | Chr Position           | Score | PCR Primer left         | PCR Primer right       | Amplicon Size |
|----------|------------------------------------------------------------------|------------------------|-------|-------------------------|------------------------|---------------|
| C-OFF 11 | AATATTTATTAACACCCGAAG -- hit<br>AATATTTCTTAAATACCCGNRG -- query  | Chr5:98629458-98629479 | 2.97  | GCCTACCTCAAATGAGAGCC    | GCTGTCTATTTCCAGCACC    | 535           |
| C-OFF 12 | AATATCATCTCAAATCCCGTGG -- hit<br>AATATCTTCTTAAATCCCGNRG -- query | Chr7:37522116-37522137 | 3.74  | GGAGTGTCAGCCACAAATGCTTC | GGGTTGGGTTGTGTTTCATCAG | 457           |

B

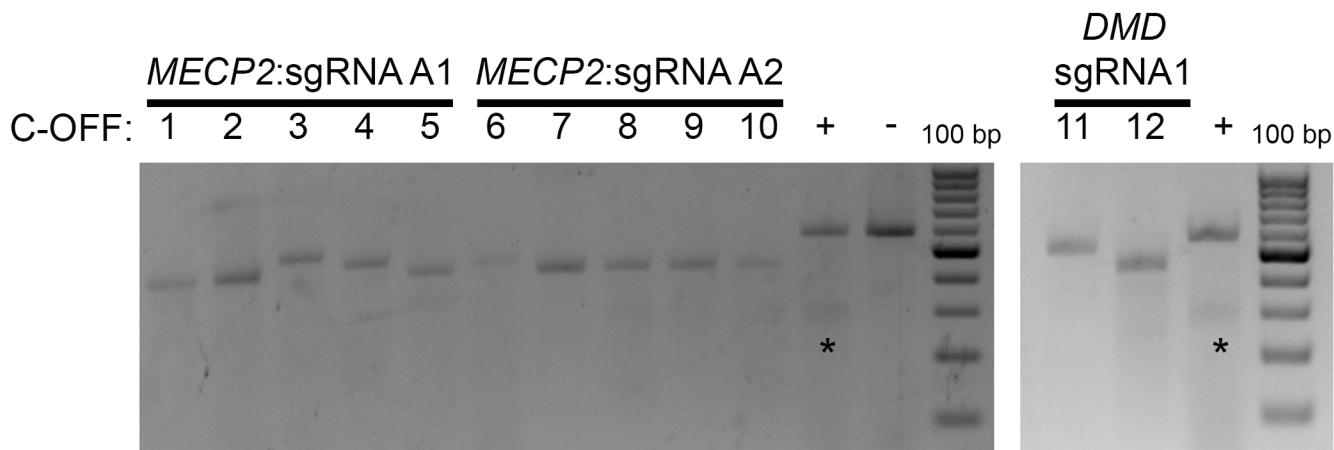

Figure S3

**Figure S3. Analysis of top 12 off-target hits predicted by the COSMID Tool.**

(A) Table identifying the sequence, score, position and primers used to amplify each off-target loci for *MECP2*: sgRNAs 1 and 2 as well as *DMD*: sgRNA 1. (B) Indel detection for predicted off-target sites shows no significant indel activity at all of the loci.

**Table S1: sgRNAs sequence identities and specificity scores**

| Disorder           | sgRNA ID                | Strand | Sequence             | PAM     | Specificity Score CRISPR MIT Design Tool |
|--------------------|-------------------------|--------|----------------------|---------|------------------------------------------|
| DMD                | A1                      | -      | GCGCCCGTCAATCAGCGC   | CGG     | Not applicable                           |
| DMD                | A2                      | +      | GATCAGCCCCACTACGTTCC | CGG     | Not applicable                           |
| DMD                | A3                      | -      | GAGAGCGCCGAGGGGAGC   | CGG     | Not applicable                           |
| DMD                | B1                      | +      | GTCATAGGAACATGAATAG  | AGG     | Not applicable                           |
| DMD                | B2                      | -      | GTCAGTAAAACTCCTTAGGC | AGG     | Not applicable                           |
| DMD                | B3                      | +      | GTTTAGAGGAGGTGGGGTT  | AGG     | Not applicable                           |
| DMD                | B4                      | -      | GCTTTATTTTTCCCATGAG  | AGG     | Not applicable                           |
| DMD - Duplication  | <i>DMD</i> : sgRNA 1    | -      | AATATCTTCTTAATACCCG  | AGG     | 75.25                                    |
| MECP2- Duplication | <i>MECP2</i> : sgRNA A1 | +      | GCTTGGCCATCTAAGTTTA  | CGG     | 74.43                                    |
| MECP2- Duplication | <i>MECP2</i> : sgRNA A2 | -      | GAGTTGTTTGGGTTAAACC  | TGG     | 71.85                                    |
| Achondroplasia     | <i>FGFR3</i> : sgRNA 1  | +      | GCATCCTCAGCTACAGGGT  | GGG     | 58                                       |
| Achondroplasia     | <i>FGFR3</i> : sgRNA 2  | +      | GCAGGCATCCTCAGCTAC   | AGG/GGG | 63                                       |

Table S2: Off target analysis performed based on CRISPR Design Tools algorithm

MECP2: sgRNA A1

| Targets | Sequence                 | CRISPR Design Tools Score <sup>1</sup> | Cosmid Score <sup>2</sup> | Locus (Gene ID) <sup>3</sup> | Indels (%) |
|---------|--------------------------|----------------------------------------|---------------------------|------------------------------|------------|
| ON      | GCTTGGCCATCTAAGTTTACGG   | 100                                    | 0                         | chrX:+153273069              | N/D        |
| OFF 1   | AGGTGGCCATCTAAGTTTATAG   | 1.7                                    | 1.21                      | chr8:+119018322              | N/D        |
| OFF 2   | AAGTTGGCCCTCTAAGTTTAAAG  | 1.3                                    | 1.28                      | chr18:-70219106              | N/D        |
| OFF 3   | TGAATGTTTCATCTAAGTTTAAAG | 0.9                                    | Not identified            | chr12:-55085547              | N/D        |
| OFF 4   | TTCTTGAGCGTCTAAGTTTAAAG  | 0.9                                    | Not identified            | chr11:-125813383             | N/D        |
| OFF 5   | TGCTAGCCCTCTAAGTTTAAAG   | 0.9                                    | Not identified            | chr9:-73214989               | N/D        |
| OFF 6   | TGCTTGACCTCTAAGTTTAAAG   | 0.8                                    | 1.43                      | chrX:-139329098              | N/D        |
| OFF 7   | CATTTTGCATCTAAGTTTATGG   | 0.8                                    | Not identified            | chr5:-53752882               | 0.86       |
| OFF 8   | TACACTGCCATCTAAGTTTAAAG  | 0.8                                    | Not identified            | chr17:+35634370              | N/D        |
| OFF 9   | TTCTTGGAAAGTCTAAGTTTAAAG | 0.8                                    | Not identified            | chr6:-91201638               | N/D        |
| OFF 10  | TGATGTGCTTCTAAGTTTAAAG   | 0.8                                    | Not identified            | chrX:-43157660               | N/D        |
| OFF 11  | AACATGGCCATCTAAGTTTGGG   | 0.7                                    | Not identified            | chr4:-160123587              | N/D        |
| OFF 12  | TCGTTGGACATTTAAGTTTAAAG  | 0.7                                    | Not identified            | chr12:+66851859              | N/D        |
| OFF 13  | AGCTGGCCCTCTAAGTTTAAAG   | 0.7                                    | Not identified            | chr7:-16277369               | N/D        |
| OFF 14  | TTCTTGGACTTCTAAGTTTGTGG  | 0.6                                    | Not identified            | chr7:-129847577              | N/D        |
| OFF 15  | TCATGGACATCCAAAGTTTAAAG  | 0.6                                    | Not identified            | chr1:+72535577               | N/D        |
| OFF 16  | TGTTTGGCCCTCTAATTTAAAG   | 0.5                                    | 2.95                      | chr14:-45589728              | N/D        |
| OFF 17  | TGTTTGGCCCTCTAATTTAAAG   | 0.5                                    | Not identified            | chr2:+155525161              | N/D        |
| OFF 18  | TTCTAGCCATCTAAGTTTCAAG   | 0.5                                    | Not identified            | chr3:-6566451                | N/D        |
| OFF 19  | TGCAAGCCATCTAAGTTTAAAG   | 0.5                                    | Not identified            | chr5:-59096266               | N/D        |
| OFF 20  | TTCTTGCCCTCTAAGTTTCTGG   | 0.4                                    | Not identified            | chr17:-75376272              | N/D        |

MECP2: sgRNA A2

| Targets | Sequence                | CRISPR Design Tools Score <sup>1</sup> | Cosmid Score <sup>2</sup> | Locus (Gene ID) <sup>3</sup> | Indels (%) |
|---------|-------------------------|----------------------------------------|---------------------------|------------------------------|------------|
| ON      | GAGTGTGTTGGGTTAAACCTGG  | 100                                    | 0                         | chrX:-153386812              | N/D        |
| OFF 1   | TGTGTTGTTTGGGTGAAACCGAG | 2.7                                    | 2.05                      | chr5:-20399210               | N/D        |
| OFF 2   | TGAGTTTTTGGGTTAAGCCTGG  | 1.2                                    | 4.23                      | chr7:+32206618               | N/D        |
| OFF 3   | ACTGTTCTTTGGGTTAAACCAAG | 0.9                                    | Not identified            | chr3:-33704075               | N/D        |
| OFF 4   | AGTTTTGTTTGGTTAAACCTAG  | 0.8                                    | Not identified            | chr16:-20201186              | N/D        |
| OFF 5   | TGAGCTATTTGGTTAAACCAAG  | 0.7                                    | 1.52                      | chr22:+26856195              | N/D        |
| OFF 6   | GCAGATGTTTGGATTAACCAAG  | 0.6                                    | Not identified            | chr8:-65798479               | 0.87       |
| OFF 7   | GAAGATGTTTGGGTTAAACCTAG | 0.5                                    | Not identified            | chrX:-116193921              | N/D        |
| OFF 8   | TGAATTCCTTTGGTTAAACCCAG | 0.5                                    | Not identified            | chr18:-73217777              | N/D        |
| OFF 9   | TGAGGTCTCAGGGTTAAACCAAG | 0.5                                    | Not identified            | chr5:-2440574                | N/D        |
| OFF 10  | TCATTTCTTTGGGTTAAACATAG | 0.5                                    | Not identified            | chr8:-22631876               | N/D        |
| OFF 11  | TGAGATGATGGGTTAAAGCTGG  | 0.5                                    | Not identified            | chr17:+74157644 (NM_052916)  | N/D        |
| OFF 12  | TTATTGGTTTGGTTAAACCAAG  | 0.4                                    | Not identified            | chr5:+115222903              | N/D        |
| OFF 13  | AGGGTTTTTGGCTAAACCTAG   | 0.4                                    | Not identified            | chr6:+151273474              | N/D        |
| OFF 14  | TGGATTGTTTTGGTTAAACCTGG | 0.4                                    | Not identified            | chr2:-55249220               | N/D        |
| OFF 15  | TGACTAGTTGGGTTAAACATGG  | 0.4                                    | Not identified            | chr20:+55793327              | N/D        |
| OFF 16  | TGAGTTGAAAGGGTTAAACACAG | 0.4                                    | Not identified            | chr1:+180894617              | N/D        |
| OFF 17  | TTTGTCTTTGGGTTAAAGCCAG  | 0.3                                    | Not identified            | chr18:+4272341               | N/D        |
| OFF 18  | TGAGCCATATGGGTTAAACCAAG | 0.3                                    | Not identified            | chr5:-58907249               | 1.00       |
| OFF 19  | TTAGTCATTTCCGTTAAACCAAG | 0.3                                    | Not identified            | chr10:+15514525              | N/D        |
| OFF 20  | AGAGGTGTGGGTTAAAGCAGG   | 0.3                                    | Not identified            | chr4:+11194960               | N/D        |

DMD: sgRNA 1

| Targets | Sequence                 | CRISPR Design Tools Score <sup>1</sup> | Cosmid Score <sup>2</sup> | Locus (Gene ID) <sup>3</sup> | Indels (%) |
|---------|--------------------------|----------------------------------------|---------------------------|------------------------------|------------|
| ON      | ATATCTTCTTAAATACCCGAAGG  | 100                                    | 0                         | chrX:+32461612               | N/D        |
| OFF 1   | AGTGTCTCTTAAATACCTGCAG   | 1.1                                    | 5.3                       | chr2:+225344609              | N/D        |
| OFF 2   | AAAACCTTCAGAAATACCCGGAG  | 0.7                                    | Not identified            | chr6:+19965267               | N/D        |
| OFF 3   | AATCTCTTCTCAATACCCCTGG   | 0.7                                    | 6.97                      | chr18:+23119458              | N/D        |
| OFF 4   | AAGAGCTGCTTAAATACCCCTGAG | 0.7                                    | Not identified            | chr11:+46836502              | 2.53       |
| OFF 5   | CATATCTCTTAAATAGCCCTGG   | 0.6                                    | 9.12                      | chr8:+67600685               | N/D        |
| OFF 6   | ATTAGCATCTTAAATACCCGAAG  | 0.5                                    | Not identified            | chr7:+130907163              | N/D        |
| OFF 7   | GATATACCTGAAATACCCGTAG   | 0.5                                    | Not identified            | chrX:-7222056                | N/D        |
| OFF 8   | ATTTCTTATGAAATACCCGAAG   | 0.5                                    | Not identified            | chr14:-91038783              | N/D        |
| OFF 9   | TAAATCCTCTTAAATACCCTAAG  | 0.5                                    | 6.89                      | chr1:-19924480               | N/D        |
| OFF 10  | GAAATCTCATAAATACCCAGGAG  | 0.5                                    | 6.16                      | chr9:-34930580               | N/D        |
| OFF 11  | AATTACTTCATAAATACCCGTAGG | 0.5                                    | Not identified            | chr5:-170343578 (NM_022897)  | N/D        |
| OFF 12  | AATTTCAACTTAAATACCCCTGG  | 0.5                                    | Not identified            | chr13:-109558634             | 1.26       |
| OFF 13  | AATTCATCTTAAATACCCCTAAG  | 0.5                                    | Not identified            | chr7:-10351725               | N/D        |
| OFF 14  | CATCTTTCTTAAATACCCCAAGG  | 0.4                                    | Not identified            | chr2:+208081568              | N/D        |
| OFF 15  | AGTTTCTTGTAAATACCCCAAGG  | 0.4                                    | Not identified            | chr6:+8264834                | N/D        |
| OFF 16  | ATTCTCTTTTAAATACCCACAG   | 0.4                                    | Not identified            | chr5:+146530145              | N/D        |
| OFF 17  | AATTTCTCTTAAATACCCCAAG   | 0.4                                    | Not identified            | chr19:-22631201              | N/D        |
| OFF 18  | AATATTTCTTCAATACCCCTGG   | 0.4                                    | 7.01                      | chr5:-146140359              | N/D        |
| OFF 19  | AATATTTCTTCAATACCCCTAAG  | 0.4                                    | 7.01                      | chr1:-185743949              | N/D        |
| OFF 20  | AATACCTCATAAAGTACCCGAAG  | 0.4                                    | 1.99                      | chr13:+23073576              | N/D        |

<sup>1</sup> CRISPR Design Tool: <http://crispr.mit.edu/>

<sup>2</sup> COSMID: <https://crispr.bme.gatech.edu/>

<sup>3</sup> aligned against hg19

N/D: Not determined

**Table S3: Targeted elimination of a dominant-negative, gain-of-function allele.**

|           | Cas9  | <i>FGFR3</i> : sgRNA 1<br>(Allele-specific) |
|-----------|-------|---------------------------------------------|
| Sequences | %     | %                                           |
| CgGGGTGG  | 47.97 | 42.481                                      |
| CaGGGTGG  | 36.74 | 26.514                                      |
| CaG-GTGGG | 0.537 | 10.851                                      |
| CaGG-TCGG | 0.333 | 2.364                                       |
| CAGGTGGC  | 0.365 | 1.952                                       |
| CCAGGGTG  | 0.95  | 1.51                                        |
| CGGGTGGC  | 0.769 | 1.151                                       |
| CTGGGTGG  | 1.196 | 0.893                                       |
| CATGGGTG  | 0.649 | 0.87                                        |
| CATGGGTC  | 0.61  | 0.577                                       |
| CATGGTGG  | 0.145 | 0.565                                       |
| CCAGGTGG  | 0.011 | 0.546                                       |
| CGGGTCGG  | 0.534 | 0.465                                       |
| CCAGGGTC  | 0.508 | 0.441                                       |
| CCGGGGTG  | 0.574 | 0.407                                       |
| CAGGGGTG  | 0.383 | 0.392                                       |
| ACAGGGTG  | 0.352 | 0.349                                       |
| CATGGTCG  | 0.107 | 0.322                                       |
| ACAGGTGG  | 0.102 | 0.276                                       |
| CGGTGGGC  | 0.022 | 0.26                                        |
| GGGTGGGC  | 0.45  | 0.236                                       |
| AGGGTGGG  | 0.261 | 0.232                                       |
| CCGGGTGG  | 0.157 | 0.227                                       |
| CGGGGTGCG | 0.441 | 0.219                                       |
| ACAGGGTC  | 0.285 | 0.218                                       |
| CCATGGGT  | 0.174 | 0.212                                       |
| CGGTGGCT  | 0.026 | 0.163                                       |
| CCAGGTGCG | 0.013 | 0.16                                        |
| CGGGGGTG  | 0.183 | 0.155                                       |
| CTGGGTGCG | 0.161 | 0.153                                       |
| AGGGTGGC  | 0.11  | 0.143                                       |
| CAGTGGGC  | 2E-04 | 0.133                                       |
| ACAGGTGCG | 0.057 | 0.132                                       |
| AGGGTCGG  | 0.156 | 0.123                                       |
| GGGGTGGG  | 0.379 | 0.122                                       |
| TGGGGTGG  | 0.26  | 0.119                                       |
| CAGGGCGG  | 0.178 | 0.112                                       |
| AGGTGGGC  | 0.011 | 0.106                                       |
| ACCAGGGT  | 0.104 | 0.105                                       |
| CTCGGGGT  | 0.389 | 0.085                                       |
| CTCGGGTG  | 0.175 | 0.049                                       |
| GGGTGGGT  | 0.128 | 0.06                                        |
| CTGGGGTC  | 0.122 | 0.052                                       |

|               | Cas9    | <i>FGFR3</i> : sgRNA 2<br>(PAM-specific) |
|---------------|---------|------------------------------------------|
| Sequences     | %       | %                                        |
| AGCTACgG      | 38.667  | 49.113                                   |
| AGCTACaG      | 54.883  | 32.805                                   |
| A - - TACaGGG | 0.001   | 9.602                                    |
| ATACGGAG      | 0.00008 | 0.645                                    |
| AGCTACGA      | 0.692   | 0.605                                    |
| AGTACAGG      | 0.029   | 0.488                                    |
| ACTACAGG      | 0.065   | 0.419                                    |
| AGCTCACG      | 0.535   | 0.374                                    |
| AGTACGGA      | 0.003   | 0.369                                    |
| GAGCTACG      | 0.264   | 0.257                                    |
| AGCTCACA      | 0.639   | 0.251                                    |
| ACTACGGA      | 0.008   | 0.228                                    |
| GCTACGGG      | 0.133   | 0.22                                     |
| GCTACAGG      | 0.244   | 0.205                                    |
| ATACGAGG      | 0.00001 | 0.182                                    |
| AGTACGGT      | 0.004   | 0.16                                     |
| GAGCTACA      | 0.333   | 0.159                                    |
| AGTACCG       | 0.133   | 0.158                                    |
| ATACGGTG      | 0.00008 | 0.158                                    |
| AGCTGACG      | 0.111   | 0.156                                    |
| AGCTGCGG      | 0.103   | 0.152                                    |
| AGCTACCA      | 0.217   | 0.132                                    |
| AGCCTACG      | 0.095   | 0.112                                    |
| ACTACGGT      | 0.009   | 0.11                                     |
| GGCTACGG      | 0.13    | 0.103                                    |
| AGCTATGG      | 0.042   | 0.102                                    |
| GGCTACAG      | 0.177   | 0.098                                    |
| AGCTGCAG      | 0.151   | 0.081                                    |
| AGCCACAG      | 0.135   | 0.073                                    |
| AGCCTACA      | 0.118   | 0.061                                    |
